# Supplementary material
Source: publisher figshare collection journal article supplement (https://frontiersin.figshare.com/ndownloader/files/26345719)

**Supplemental Figure 1:** Immunohistochemical staining for EpCAM in formalin-fixed paraffin-embedded histologic sections of a grade II tubulopapillary mammary carcinoma from a cat using a goat polyclonal R&D anti-EpCAM antibody (DAB chromogen). Staining at intercellular junctions is present in surface and deep neoplastic epithelial cells (arrows) with the polyclonal R&D anti-EpCAM antibody (**A**, **C**) but not the goat IgG control (**B**, **D**), despite non-specific background staining with the latter. Not all of the tumor showed positive staining reactions (**A**, **B**: Scale bar = 50  $\mu$ m; **C**, **D**: Scale bar = 20  $\mu$ m).

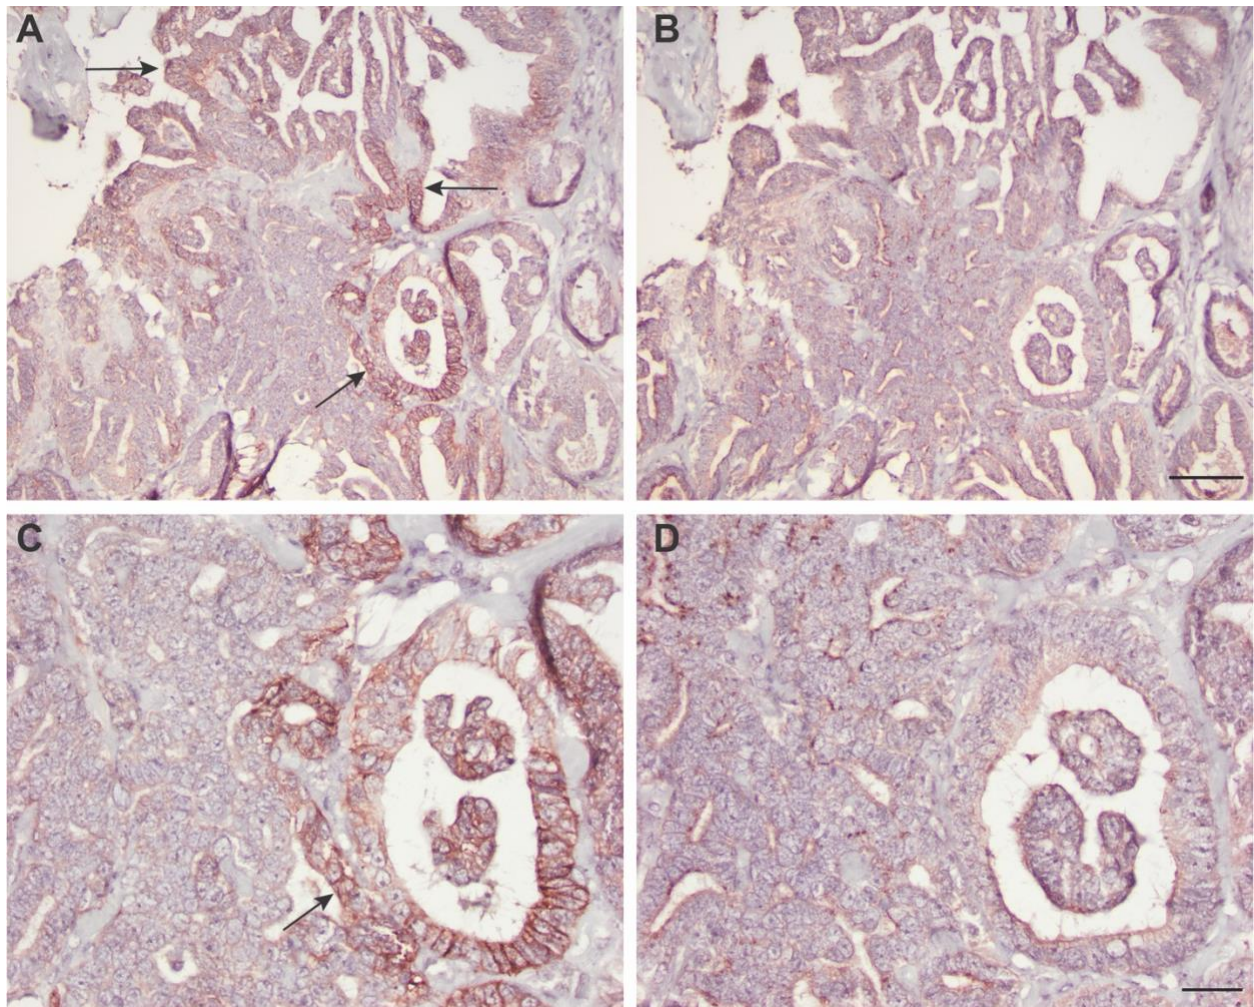

**Supplemental Figure 2:** Immunohistochemical staining for EpCAM in normal feline cutaneous and oral tissue and an oropharyngeal squamous cell carcinoma using a goat polyclonal R&D anti-EpCAM antibody (**A-B**: DAB chromogen, **C-F**: Nova red chromogen). No membrane staining is evident in the epithelial cells of the skin in a section from a grade III mammary tubular carcinoma in a cat that contained normal cutaneous tissue with the anti-EpCAM antibody (**A**) or goat IgG control (**B**) (scale bar = 50  $\mu$ m). Similarly, normal gingival mucosa (**C**) and overlying normal gingival tissue and neoplastic epithelial cells in an oropharyngeal squamous cell carcinoma (**E**) were negative when stained with the R&D EpCAM antibody, as were the corresponding goat IgG controls (**D**, **F**) (scale bars = 50  $\mu$ m).

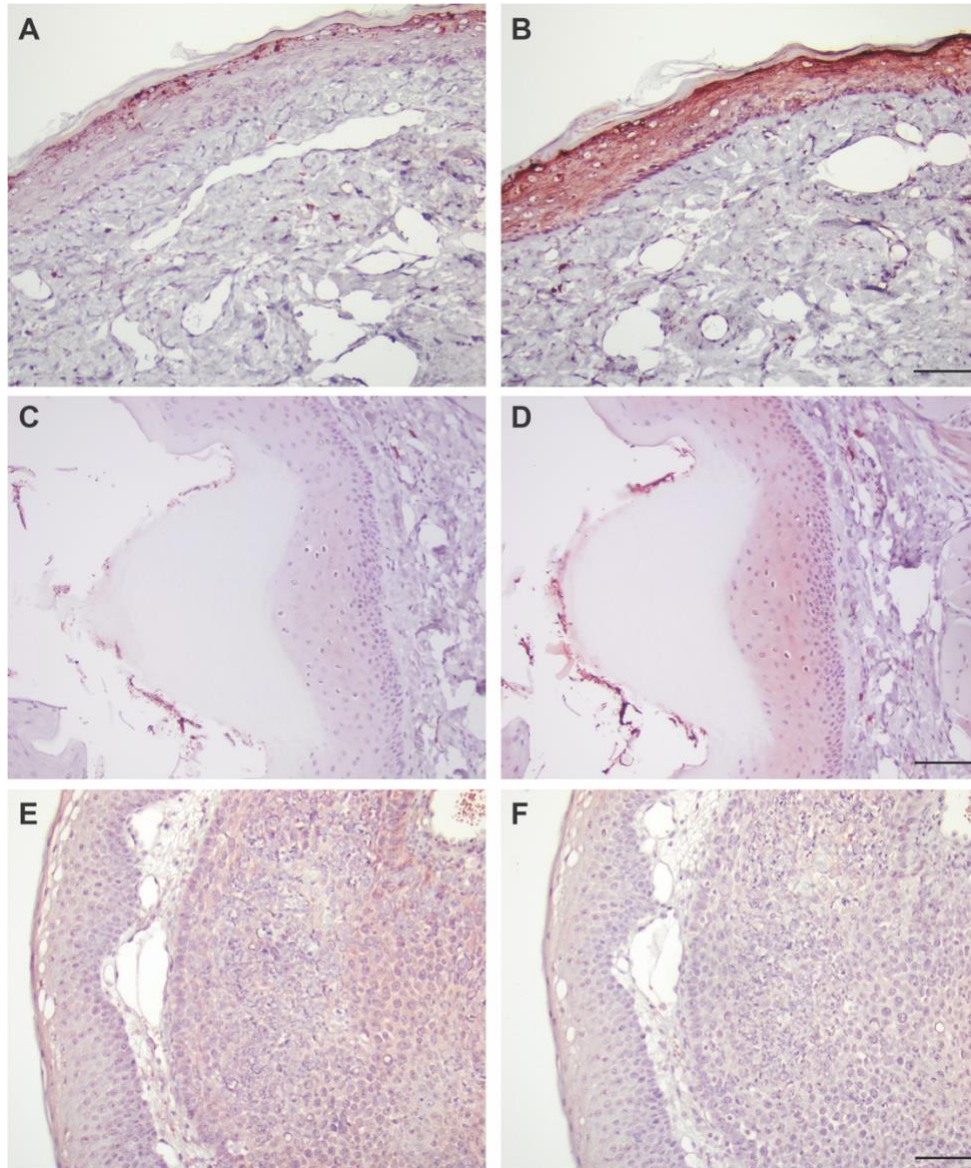

Supplement: Supplementary file [file 26345719]
